# Supplementary material for: Targeted Resequencing and Analysis of the Diamond-Blackfan Anemia Disease Locus RPS19
Source: PubMed Central journal article supplement (PMC2703794; doi:10.1371/journal.pone.0006172), 2009-07-09
Supplement: pone.0006172.s001.pdf [file pone.0006172.s001.pdf]

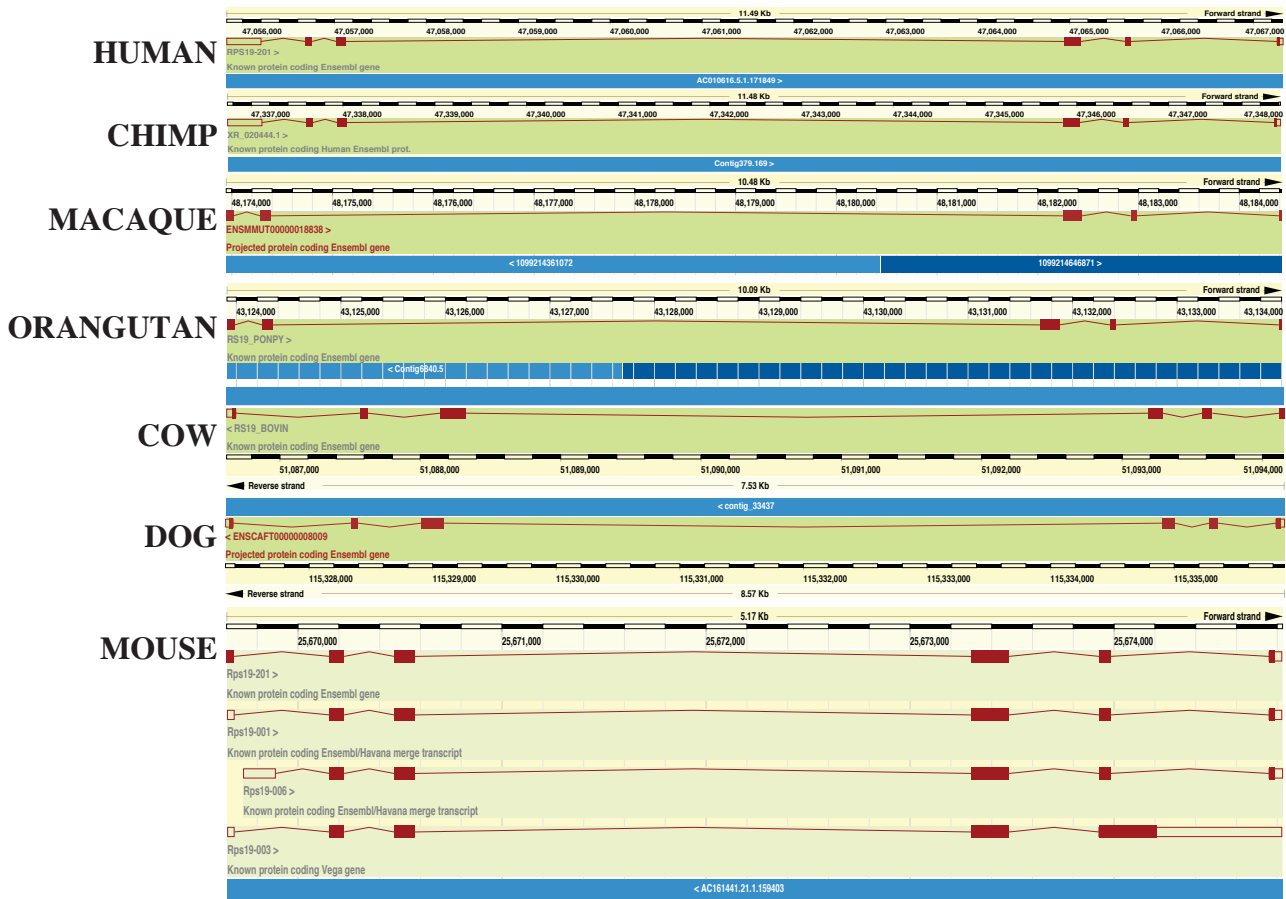

Barrio\_Supplementary Figure S1
