# Supplementary material for: Targeted Resequencing and Analysis of the Diamond-Blackfan Anemia Disease Locus RPS19
Source: PubMed Central journal article supplement (PMC2703794; doi:10.1371/journal.pone.0006172), 2009-07-09
Supplement: pone.0006172.s004.pdf [file pone.0006172.s004.pdf]

**Table S2:** Primer sequences for analysis of 5'upstream region

| Name      | Sequence <sup>a</sup> | Binding to sequence <sup>b</sup> |          |
|-----------|-----------------------|----------------------------------|----------|
|           |                       | start                            | stop     |
| OE56 F    | GCCACTGAGATTTGGAGAGTG | 47048065                         | 47048085 |
| OE56 R    | GTGAAGCCGACTTTGGTCTC  | 47049580                         | 47049599 |
| (b) F     | ACCCTTAGAAGGGGCTCAAG  | 47049362                         | 47049381 |
| (b) R     | GGCAGCATTGGAGTGTGTTA  | 47051000                         | 47051019 |
| UCR F     | CCATCTATGTCTCCCCCTCA  | 47050860                         | 47050879 |
| UCR R     | TCCCAAAGTTCCGAGATCAG  | 47051435                         | 47051454 |
| OE12 F    | AAGCGATTCTCATGCCTCAT  | 47052314                         | 47053333 |
| OE12 R    | TCTGCAAGTTTTGGCAAATG  | 47053276                         | 47053295 |
| NOVEL1 F  | ACTGCACTCCAGAGCAGGAC  | 47053995                         | 47054014 |
| NOVEL1 R  | ACCCATTTATCCCTCCATCC  | 47054195                         | 47054214 |
| NOVEL12 F | GCAGCCTTCCTCAAAAAGTG  | 47056740                         | 47056759 |
| NOVEL12R  | CCCTCCCCTCAACACAATA   | 47056936                         | 47056955 |

<sup>a</sup>5' to 3' direction

<sup>b</sup>coordinates on chromosome 19 (hg18)

Barrio\_table S2
