# Supplementary material for: Targeted Resequencing and Analysis of the Diamond-Blackfan Anemia Disease Locus RPS19
Source: PLoS One. 2009 Jul 9;4(7):e6172. doi: 10.1371/journal.pone.0006172 (PMC2703794; doi:10.1371/journal.pone.0006172)
Supplement: Table S1 — Full list of all detected TFBS overlaying identified variations. a location of the SNP/TFBS with respect to the RPS19 open reading frame b database identifier (dbSNP) for previously described SNPs or number of novel SNP, respectively. We complement this field with a small registry of which TFBSs are created (+) or destroyed (−) in a certain SNP (the actual SNP if not stated) and the detection score for this binding site if applicable. c SNP alleles, indicating reference and alternative (replace) allele d name of transcription factor or motif recognized, as named in the databases e library, version of the library and identifier to which a TFBS is associated under a PWM database release f motif recognized (5′ to 3′ sequence). Allele positioning marked in bold. Alleles falling exactly adjacent to the end of a motif highlighted in bold and italics. Capital letters highlight important positions for the putative binding strength of a motif. Chromosome, start, end position and strand within the human reference genome (hg18, build 36.1) g score for the reference genome allele. MATCH and pMATCH use 1.000 as maximum score between an optimal binding site match and matrix power of detection. TOUCAN detection tools (MotifScanner, MotifLocator, MotifSampler) do not use global maximum or matrix scoring, but the higher the numbers, the better the predicted site. The a priori probability or threshold is stated under the score when any of the TOUCAN tools has been used h score for non-reference allele i program used for detection of a motif. Error minimization criteria stated when applicable j transcript factor contained in any of the multi-conserved sequence (MCS) region of the multi-species alignment. The first value belongs to the Infocon program and the second to the EPO EnsEMBL track. ‘Y’ indicates that the TFBS motif is totally contained in the area (see supplementary figure S1 and text S2), ‘y+’ that there is major overlapping part (>75%), ‘y’ that there is significant overlap [file pone.0006172.s003.pdf]

| Region <sup>1</sup> | SNP <sup>2</sup>                                               | RefSNP <sup>3</sup> | TFSB name <sup>4</sup>                      | Source <sup>5</sup>  | Motif <sup>6</sup>    | Ref allele score <sup>7</sup> | Non-ref allele score <sup>8</sup>  | Tool <sup>9</sup>      | MCS <sup>10</sup> |
|---------------------|----------------------------------------------------------------|---------------------|---------------------------------------------|----------------------|-----------------------|-------------------------------|------------------------------------|------------------------|-------------------|
| upstream            | novel-1<br>(-YY1)                                              | [G/A]               | YY1 (Yin and Yang 1)                        | Transfac:v7.0.M00059 | tsatCCCCAGGAGTtggg    | -                             | 0.9960/976                         |                        | (N N)             |
|                     |                                                                |                     | Pax-2 (Paired box 2)                        | Transfac:v7.0.M00098 | aatcCACCGGAGtggggag   | 0.9920/943                    | -                                  |                        | (N N)             |
|                     |                                                                |                     | Pax-2                                       | Transfac:v7.0.M00098 | 1947049006-47049024+1 | 0.9180/940                    | 0.910/0.936                        |                        | (N N)             |
|                     |                                                                |                     | HOXA3 (Homeobox cluster protein)            | Transfac:v7.0.M00395 | atccCGGAGGAGGtggg     | 1.0000/963                    | -                                  | pMATCH (minSUM)        | (N N)             |
|                     |                                                                |                     | HOXA3                                       | Transfac:v7.0.M00395 | 1947049012-47049020+1 | 0.9400/941                    | 0.956/0.953                        |                        | (N N)             |
|                     |                                                                |                     | CdxA (CdxA homeobox gene)                   | Transfac:v7.0.M00100 | 1947049014-47049022+1 | 1.0000/992                    | 1.0000/992                         |                        | (N N)             |
|                     |                                                                |                     | YY1                                         | Transfac:v7.0.M00069 | 1947049015-47049022+1 | 0.9960/982                    | -                                  |                        | (N N)             |
|                     |                                                                |                     | Pax-2                                       | Transfac:v7.0.M00098 | 1947049016-47049022+1 | 0.9820/922                    | 0.9820/919                         |                        | (N N)             |
|                     |                                                                |                     | Ev1-1 (Ectopic viral integration site 1)    | Transfac:v7.0.M00081 | 1947049017-47049022+1 | 0.7940/863                    | 0.7940/863                         |                        | (N N)             |
|                     |                                                                |                     | HOXA3                                       | Transfac:v7.0.M00395 | 1947049018-47049022+1 | 0.9540/948                    | 0.9540/948                         |                        | (N N)             |
| upstream            | rs4803512<br>(-2 x Pax-2, YY1, 2 x HOXA3)                      | [A/C]               | Pax-2                                       | Transfac:v7.0.M00098 | 1947049019-47049022+1 | 0.9470/891                    | -                                  |                        | (N N)             |
|                     |                                                                |                     | Pax-2                                       | Transfac:v7.0.M00098 | 1947049020-47049022+1 | 0.9750/903                    | -                                  | pMATCH (minSUM)        | (N N)             |
|                     |                                                                |                     | CdxA                                        | Transfac:v7.0.M00100 | 1947049021-47049022+1 | 1.0000/975                    | 1.0000/971                         |                        | (N N)             |
|                     |                                                                |                     | HOXA3                                       | Transfac:v7.0.M00395 | 1947049022-47049022+1 | 0.9700/946                    | -                                  |                        | (N N)             |
|                     |                                                                |                     | HOXA3                                       | Transfac:v7.0.M00395 | 1947049023-47049022+1 | 1.0000/975                    | -                                  |                        | (N N)             |
|                     |                                                                |                     | Pax-2                                       | Transfac:v7.0.M00098 | 1947049024-47049022+1 | 0.9810/946                    | 0.9810/945                         |                        | (N N)             |
|                     |                                                                |                     | HOXA3                                       | Transfac:v7.0.M00395 | 1947049025-47049022+1 | -                             | 0.9570/961                         |                        | (N N)             |
|                     |                                                                |                     | Msx-1 (Msh-like homeobox protein 1)         | Transfac:v7.0.M00394 | 1947049026-47049022+1 | 1.0001/1.000                  | 1.0001/1.000                       | pMATCH (minSUM, minFP) | (N N)             |
|                     |                                                                |                     | Pax-2                                       | Transfac:v7.0.M00098 | 1947049027-47049022+1 | 0.9240/893                    | 0.9240/894 (cttcCTCCctccctagataa)  |                        | (N N)             |
|                     |                                                                |                     | HOXA3                                       | Transfac:v7.0.M00395 | 1947049028-47049022+1 | 0.9260/942                    | -                                  |                        | (N N)             |
| upstream            | rs3214574<br>(+Pax-6, C/EBPalpha, C/EBPbeta, 2 x Ev1-1, C/EBP) | [A/C]               | C/EBPalpha (CCAAT/enhancer binding protein) | Transfac:v7.0.M00116 | ccctTTAGataactt       | -                             | 1.0000/997                         |                        | (N N)             |
|                     |                                                                |                     | C/EBPbeta                                   | Transfac:v7.0.M00117 | ccctTTAGataactt       | -                             | 1.0000/977                         |                        | (N N)             |
|                     |                                                                |                     | HOXA3                                       | Transfac:v7.0.M00395 | 1947049029-47049022+1 | 0.9870/942                    | 0.9870/942 (ccCTTAGataa)           |                        | (N N)             |
|                     |                                                                |                     | Ev1-1                                       | Transfac:v7.0.M00081 | 1947049030-47049022+1 | -                             | 0.8050/874                         |                        | (N N)             |
|                     |                                                                |                     | C/EBP                                       | Transfac:v7.0.M00159 | 1947049031-47049022+1 | -                             | 0.9800/973                         |                        | (N N)             |
|                     |                                                                |                     | Msx-1                                       | Transfac:v7.0.M00394 | 1947049032-47049022+1 | 0.9550/933                    | 0.9620/938 (cctTAGATA)             | pMATCH (minSUM)        | (N N)             |
|                     |                                                                |                     | Ev1-1                                       | Transfac:v7.0.M00081 | 1947049033-47049022+1 | -                             | 0.8050/874                         |                        | (N N)             |
|                     |                                                                |                     | HOXA3                                       | Transfac:v7.0.M00395 | 1947049034-47049022+1 | 0.9570/943                    | -                                  |                        | (N N)             |
|                     |                                                                |                     | Ev1-1                                       | Transfac:v7.0.M00081 | 1947049035-47049022+1 | 0.8980/844                    | -                                  |                        | (N N)             |
|                     |                                                                |                     | Pax-2                                       | Transfac:v7.0.M00098 | 1947049036-47049022+1 | 0.9720/897                    | 0.9720/896 (ttgATAACCTtagatataa)   |                        | (N N)             |
| upstream            | rs6509002<br>(-Ev1-1, RORalpha1, Pax2, PPARalpha, PPARgamma)   | [C/T]               | Oct-1 (octamer-binding factor 1)            | Transfac:v7.0.M00137 | gTcCTTATACCTtagatataa | 0.9960/992                    | 0.9960/992 (ttgATAACCTtagatataa)   |                        | (N N)             |
|                     |                                                                |                     | Ev1-1                                       | Transfac:v7.0.M00081 | 1947049037-47049022+1 | 0.9310/828                    | 0.9620/880                         |                        | (N N)             |
|                     |                                                                |                     | Oct-1                                       | Transfac:v7.0.M00162 | 1947049038-47049022+1 | 0.9820/960                    | 0.9820/960 (1947049620-47049633+1) |                        | (N N)             |
|                     |                                                                |                     | Pax-6                                       | Transfac:v7.0.M00097 | 1947049039-47049022+1 | -                             | 0.9870/976                         | pMATCH (minSUM, minFP) | (N N)             |
|                     |                                                                |                     | HOXA3                                       | Transfac:v7.0.M00395 | 1947049040-47049022+1 | 1.0000/995                    | 1.0000/995                         |                        | (N N)             |
|                     |                                                                |                     | GATA-1 (GATA-binding factor 1)              | Transfac:v7.0.M00346 | 1947049041-47049022+1 | -0.9                          | 1629/460.9                         |                        | (N N)             |
|                     |                                                                |                     | GATA-2 (GATA-binding factor 2)              | Transfac:v7.0.M00082 | 1947049042-47049022+1 | -0.9                          | 3124/50.9                          |                        | (N N)             |
|                     |                                                                |                     | Ev1-1                                       | Transfac:v7.0.M00082 | 1947049043-47049022+1 | -0.9                          | 670.9030/9                         | MotifScanner           | (N N)             |
|                     |                                                                |                     | Cdc5 (Cdc5 cell division control protein 5) | Transfac:v7.0.M00478 | 1947049044-47049022+1 | 3343.590/9                    | -0.9                               |                        | (N N)             |
|                     |                                                                |                     | Pax-2                                       | Transfac:v7.0.M00098 | 1947049045-47049022+1 | 0.9570/943                    | -                                  |                        | (N N)             |
| upstream            | rs6509002<br>(-Ev1-1, RORalpha1, Pax2, PPARalpha, PPARgamma)   | [C/T]               | Ev1-1                                       | Transfac:v7.0.M00081 | 1947049046-47049022+1 | 0.8980/844                    | -                                  |                        | (N N)             |
|                     |                                                                |                     | Pax-2                                       | Transfac:v7.0.M00098 | 1947049047-47049022+1 | 0.9720/897                    | 0.9720/896 (ttgATAACCTtagatataa)   |                        | (N N)             |
|                     |                                                                |                     | Oct-1 (octamer-binding factor 1)            | Transfac:v7.0.M00137 | gTcCTTATACCTtagatataa | 0.9960/992                    | 0.9960/992 (ttgATAACCTtagatataa)   |                        | (N N)             |
|                     |                                                                |                     | Ev1-1                                       | Transfac:v7.0.M00081 | 1947049048-47049022+1 | 0.9310/828                    | 0.9620/880                         |                        | (N N)             |
|                     |                                                                |                     | Oct-1                                       | Transfac:v7.0.M00162 | 1947049049-47049022+1 | 0.9820/960                    | 0.9820/960 (1947049620-47049633+1) |                        | (N N)             |
|                     |                                                                |                     | Pax-6                                       | Transfac:v7.0.M00097 | 1947049050-47049022+1 | -                             | 0.9870/976                         | pMATCH (minSUM, minFP) | (N N)             |
|                     |                                                                |                     | HOXA3                                       | Transfac:v7.0.M00395 | 1947049051-47049022+1 | 1.0000/995                    | 1.0000/995                         |                        | (N N)             |
|                     |                                                                |                     | GATA-1 (GATA-binding factor 1)              | Transfac:v7.0.M00346 | 1947049052-47049022+1 | -0.9                          | 1629/460.9                         |                        | (N N)             |
|                     |                                                                |                     | GATA-2 (GATA-binding factor 2)              | Transfac:v7.0.M00082 | 1947049053-47049022+1 | -0.9                          | 3124/50.9                          |                        | (N N)             |
|                     |                                                                |                     | Ev1-1                                       | Transfac:v7.0.M00082 | 1947049054-47049022+1 | -0.9                          | 670.9030/9                         | MotifScanner           | (N N)             |
| upstream            | rs6509002<br>(-Ev1-1, RORalpha1, Pax2, PPARalpha, PPARgamma)   | [C/T]               | Pax-2                                       | Transfac:v7.0.M00098 | 1947049055-47049022+1 | 0.9570/943                    | -                                  |                        | (N N)             |
|                     |                                                                |                     | Oct-1 (octamer-binding factor 1)            | Transfac:v7.0.M00137 | gTcCTTATACCTtagatataa | 0.9960/992                    | 0.9960/992 (ttgATAACCTtagatataa)   |                        | (N N)             |
|                     |                                                                |                     | Ev1-1                                       | Transfac:v7.0.M00081 | 1947049056-47049022+1 | 0.9310/828                    | 0.9620/880                         |                        | (N N)             |
|                     |                                                                |                     | Oct-1                                       | Transfac:v7.0.M00162 | 1947049057-47049022+1 | 0.9820/960                    | 0.9820/960 (1947049620-47049633+1) |                        | (N N)             |
|                     |                                                                |                     | Pax-6                                       | Transfac:v7.0.M00097 | 1947049058-47049022+1 | -                             | 0.9870/976                         | pMATCH (minSUM, minFP) | (N N)             |
|                     |                                                                |                     | HOXA3                                       | Transfac:v7.0.M00395 | 1947049059-47049022+1 | 1.0000/995                    | 1.0000/995                         |                        | (N N)             |
|                     |                                                                |                     | GATA-1 (GATA-binding factor 1)              | Transfac:v7.0.M00346 | 1947049060-47049022+1 | -0.9                          | 1629/460.9                         |                        | (N N)             |
|                     |                                                                |                     | GATA-2 (GATA-binding factor 2)              | Transfac:v7.0.M00082 | 1947049061-47049022+1 | -0.9                          | 3124/50.9                          |                        | (N N)             |
|                     |                                                                |                     | Ev1-1                                       | Transfac:v7.0.M00082 | 1947049062-47049022+1 | -0.9                          | 670.9030/9                         | MotifScanner           | (N N)             |
|                     |                                                                |                     | Cdc5 (Cdc5 cell division control protein 5) | Transfac:v7.0.M00478 | 1947049063-47049022+1 | 3343.590/9                    | -0.9                               |                        | (N N)             |
| upstream            | rs6509002<br>(-Ev1-1, RORalpha1, Pax2, PPARalpha, PPARgamma)   | [C/T]               | Pax-2                                       | Transfac:v7.0.M00098 | 1947049064-47049022+1 | 0.9570/943                    | -                                  |                        | (N N)             |
|                     |                                                                |                     | Oct-1 (octamer-binding factor 1)            | Transfac:v7.0.M00137 | gTcCTTATACCTtagatataa | 0.9960/992                    | 0.9960/992 (ttgATAACCTtagatataa)   |                        | (N N)             |
|                     |                                                                |                     | Ev1-1                                       | Transfac:v7.0.M00081 | 1947049065-47049022+1 | 0.9310/828                    | 0.9620/880                         |                        | (N N)             |
|                     |                                                                |                     | Oct-1                                       | Transfac:v7.0.M00162 | 1947049066-47049022+1 | 0.9820/960                    | 0.9820/960 (1947049620-47049633+1) |                        | (N N)             |
|                     |                                                                |                     | Pax-6                                       | Transfac:v7.0.M00097 | 1947049067-47049022+1 | -                             | 0.9870/976                         | pMATCH (minSUM, minFP) | (N N)             |
|                     |                                                                |                     | HOXA3                                       | Transfac:v7.0.M00395 | 1947049068-47049022+1 | 1.0000/995                    | 1.0000/995                         |                        | (N N)             |
|                     |                                                                |                     | GATA-1 (GATA-binding factor 1)              | Transfac:v7.0.M00346 | 1947049069-47049022+1 | -0.9                          | 1629/460.9                         |                        | (N N)             |
|                     |                                                                |                     | GATA-2 (GATA-binding factor 2)              | Transfac:v7.0.M00082 | 1947049070-47049022+1 | -0.9                          | 3124/50.9                          |                        | (N N)             |
|                     |                                                                |                     | Ev1-1                                       | Transfac:v7.0.M00082 | 1947049071-47049022+1 | -0.9                          | 670.9030/9                         | MotifScanner           | (N N)             |
|                     |                                                                |                     | Cdc5 (Cdc5 cell division control protein 5) | Transfac:v7.0.M00478 | 1947049072-47049022+1 | 3343.590/9                    | -0.9                               |                        | (N N)             |
| upstream            | rs6509002<br>(-Ev1-1, RORalpha1, Pax2, PPARalpha, PPARgamma)   | [C/T]               | Pax-2                                       | Transfac:v7.0.M00098 | 1947049073-47049022+1 | 0.9570/943                    | -                                  |                        | (N N)             |
|                     |                                                                |                     | Oct-1 (octamer-binding factor 1)            | Transfac:v7.0.M00137 | gTcCTTATACCTtagatataa | 0.9960/992                    | 0.9960/992 (ttgATAACCTtagatataa)   |                        | (N N)             |
|                     |                                                                |                     | Ev1-1                                       | Transfac:v7.0.M00081 | 1947049074-47049022+1 | 0.9310/828                    | 0.9620/880                         |                        | (N N)             |
|                     |                                                                |                     | Oct-1                                       | Transfac:v7.0.M00162 | 1947049075-47049022+1 | 0.9820/960                    | 0.9820/960 (1947049620-47049633+1) |                        | (N N)             |
|                     |                                                                |                     | Pax-6                                       | Transfac:v7.0.M00097 | 1947049076-47049022+1 | -                             | 0.9870/976                         | pMATCH (minSUM, minFP) | (N N)             |
|                     |                                                                |                     | HOXA3                                       | Transfac:v7.0.M00395 | 1947049077-47049022+1 | 1.0000/995                    | 1.0000/995                         |                        | (N N)             |
|                     |                                                                |                     | GATA-1 (GATA-binding factor 1)              | Transfac:v7.0.M00346 | 1947049078-47049022+1 | -0.9                          | 1629/460.9                         |                        | (N N)             |
|                     |                                                                |                     | GATA-2 (GATA-binding factor 2)              | Transfac:v7.0.M00082 | 1947049079-47049022+1 | -0.9                          | 3124/50.9                          |                        | (N N)             |
|                     |                                                                |                     | Ev1-1                                       | Transfac:v7.0.M00082 | 1947049080-47049022+1 | -0.9                          | 670.9030/9                         | MotifScanner           | (N N)             |
|                     |                                                                |                     | Cdc5 (Cdc5 cell division control protein 5) | Transfac:v7.0.M00478 | 1947049081-47049022+1 | 3343.590/9                    | -0.9                               |                        | (N N)             |
| upstream            | rs6509002<br>(-Ev1-1, RORalpha1, Pax2, PPARalpha, PPARgamma)   | [C/T]               | Pax-2                                       | Transfac:v7.0.M00098 | 1947049082-47049022+1 | 0.9570/943                    | -                                  |                        | (N N)             |
|                     |                                                                |                     | Oct-1 (octamer-binding factor 1)            | Transfac:v7.0.M00137 | gTcCTTATACCTtagatataa | 0.9960/992                    | 0.9960/992 (ttgATAACCTtagatataa)   |                        | (N N)             |
|                     |                                                                |                     | Ev1-1                                       | Transfac:v7.0.M00081 | 1947049083-47049022+1 | 0.9310/828                    | 0.9620/880                         |                        | (N N)             |
|                     |                                                                |                     | Oct-1                                       | Transfac:v7.0.M00162 | 1947049084-47049022+1 | 0.9820/960                    | 0.9820/960 (1947049620-47049633+1) |                        | (N N)             |
|                     |                                                                |                     | Pax-6                                       | Transfac:v7.0.M00097 | 1947049085-47049022+1 | -                             | 0.9870/976                         | pMATCH (minSUM, minFP) | (N N)             |
|                     |                                                                |                     | HOXA3                                       | Transfac:v7.0.M00395 |                       |                               |                                    |                        |                   |
